# Supplementary material for: Century-old chromatin architecture revealed in formalin-fixed vertebrates
Source: PubMed Central journal article supplement (PMC11286846; doi:10.1038/s41467-024-50668-4), 2024-07-29
Supplement: 41467_2024_50668_MOESM3_ESM.pdf [file 41467_2024_50668_MOESM3_ESM.pdf]

Century-old chromatin architecture revealed in formalin-fixed vertebrates

**Description of Additional Supplementary Files**

**Supplementary Data 1:** List of all reagent sources.
